# Supplementary material for: Surface gallium oxide hydroxide species adsorbing carbon dioxide to enhance the photocatalytic activity of silver-loaded calcium titanate for carbon dioxide reduction with water
Source: Royal Society of Chemistry journal article supplement (doi:10.1039/d3se01390a), 2024-01-01
Supplement: d3se01390a1.pdf [file d3se01390a1.pdf]

## Supporting Information

# Surface gallium oxide hydroxide species adsorbing carbon dioxide to enhance the photocatalytic activity of a silver-loaded calcium titanate for carbon dioxide reduction with water

Hongxuan Qiu, Akira Yamamoto, and Hisao Yoshida \*

*Graduate School of Human and Environmental Studies, Kyoto University, Kyoto 606-8501, Japan*

\* yoshida.hisao.2a@kyoto-u.ac.jp

**Table S1.** Actual amounts in the prepared samples determined by XRF analysis.

| Entry | Sample                 | Loading amount of Ag (wt %) | Loading amount of Ga (wt%) |
|-------|------------------------|-----------------------------|----------------------------|
| 1     | Ag(1.0)/CTO            | 0.84                        | -                          |
| 2     | GaOOH(1.0)/CTO         | -                           | 0.92                       |
| 3     | Ag(1.0)/GaOOH(1.0)/CTO | 0.85                        | 0.91                       |

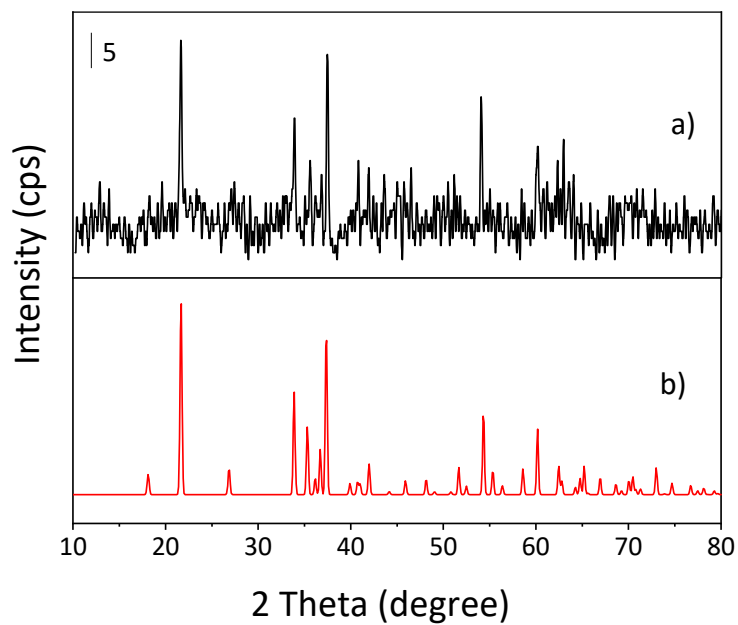

**Figure S1.** XRD patterns of (a) the homemade GaOOH, and (b) standard database of GaOOH (ICSD# 409671).

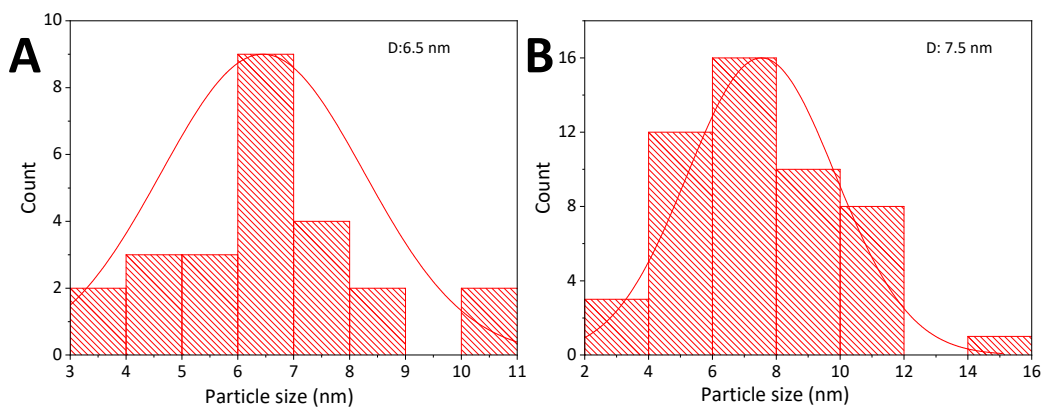

**Figure S2.** The Ag particle size of [A] Figure 3 B and [B] Figure 3 D.

**Table S2** SSA of the bare CTO and GaOOH(1.0)/CTO samples.

| Entry | Sample         | Specific surface area <sup>a</sup> / m <sup>2</sup> g <sup>-1</sup> |
|-------|----------------|---------------------------------------------------------------------|
| 1     | Bare CTO       | 2.2                                                                 |
| 2     | GaOOH(1.0)/CTO | 2.4                                                                 |

<sup>a</sup> Estimated by a BET method from N<sub>2</sub> adsorption experiment at 77 K.

**Table S3.** Results of water splitting over bare CTO and GaOOH(1.0)/CTO samples.

| Entry | Sample                 | Production rate (μmol h <sup>-1</sup> ) <sup>a</sup> |                |
|-------|------------------------|------------------------------------------------------|----------------|
|       |                        | H <sub>2</sub>                                       | O <sub>2</sub> |
| 1     | Bare CTO               | 0.3                                                  | 0.1            |
| 2     | GaOOH(1.0)/CTO         | 0.9                                                  | 0.4            |
| 3     | Ag(1.0)/GaOOH(1.0)/CTO | 0.5                                                  | 0.2            |

<sup>a</sup> The production rates were measured after 3.5 h of photoirradiation.

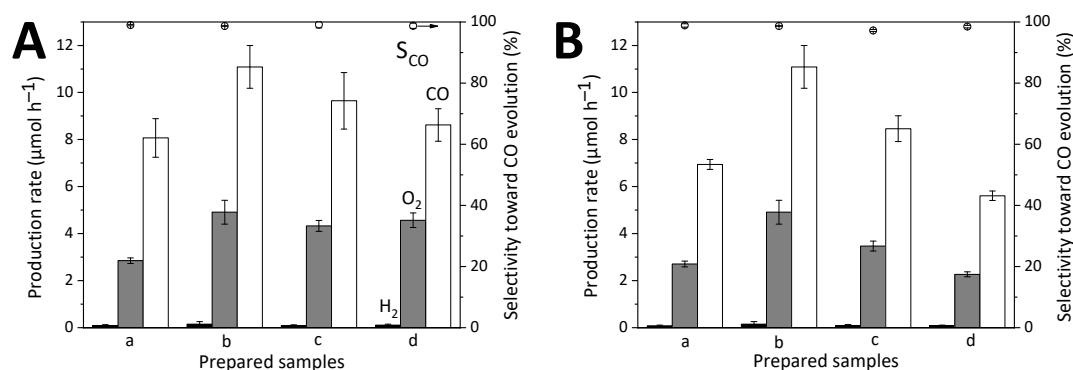

**Figure S3.** Results of the photocatalytic reaction tests of CO<sub>2</sub> reduction with H<sub>2</sub>O over [A] Ag(1.0)/GaOOH(y)/CTO samples, where the y wt% was (a) 0.5, (b) 1.0, (c) 3.0, and (d) 5.0; [B] Ag(x)/GaOOH(1.0)/CTO samples, where the x wt% was (a) 0.5, (b) 1.0, (c) 3.0, and (d) 5.0.

**Table S4.** Results of the first and second runs in the photocatalytic CO<sub>2</sub> reduction with the Ag(1.0)/GaOOH(1.0)/CTO sample.

| Run             | Sample weight (g) | Production rate (μmol h <sup>-1</sup> ) <sup>a</sup> |                |      | S <sub>CO</sub> (%) |
|-----------------|-------------------|------------------------------------------------------|----------------|------|---------------------|
|                 |                   | H <sub>2</sub>                                       | O <sub>2</sub> | CO   |                     |
| 1 <sup>st</sup> | 0.3               | 0.2                                                  | 4.9            | 11.1 | 98.7                |
| 2 <sup>nd</sup> | 0.28              | 0.1                                                  | 3.6            | 8.2  | 98.7                |

<sup>a</sup> The production rates were measured after 3.5 h of photoirradiation.

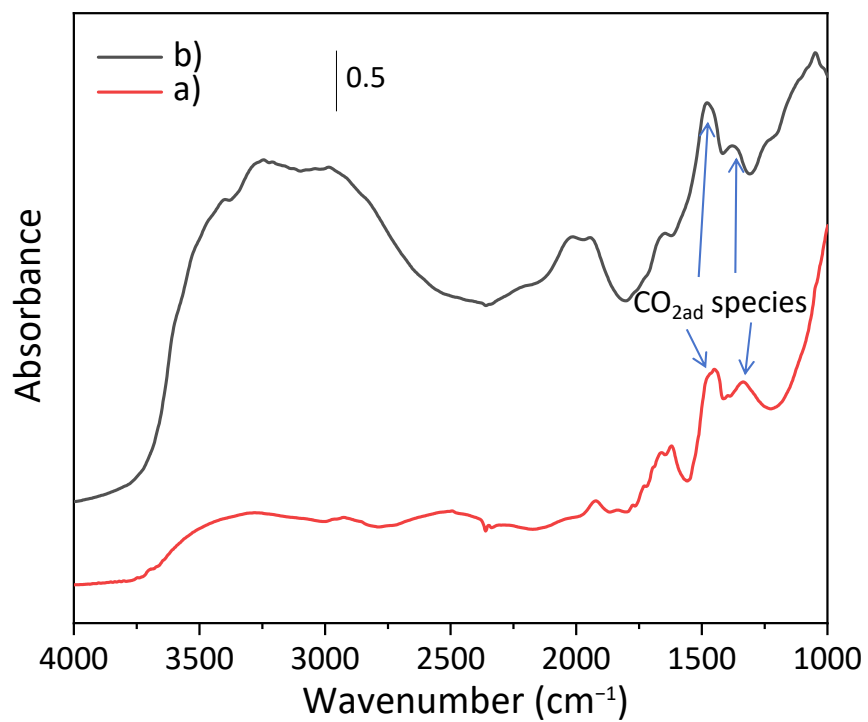

**Figure S4.** FT-IR spectra of the treated samples, (a) GaOOH(0.5)/CTO and (b) GaOOH(1.0)/CTO, which were photoirradiated in a 1.0 M  $\text{NaHCO}_3$  solution with a bubbling  $\text{CO}_2$  flow, followed by filtering, and drying at room temperature.

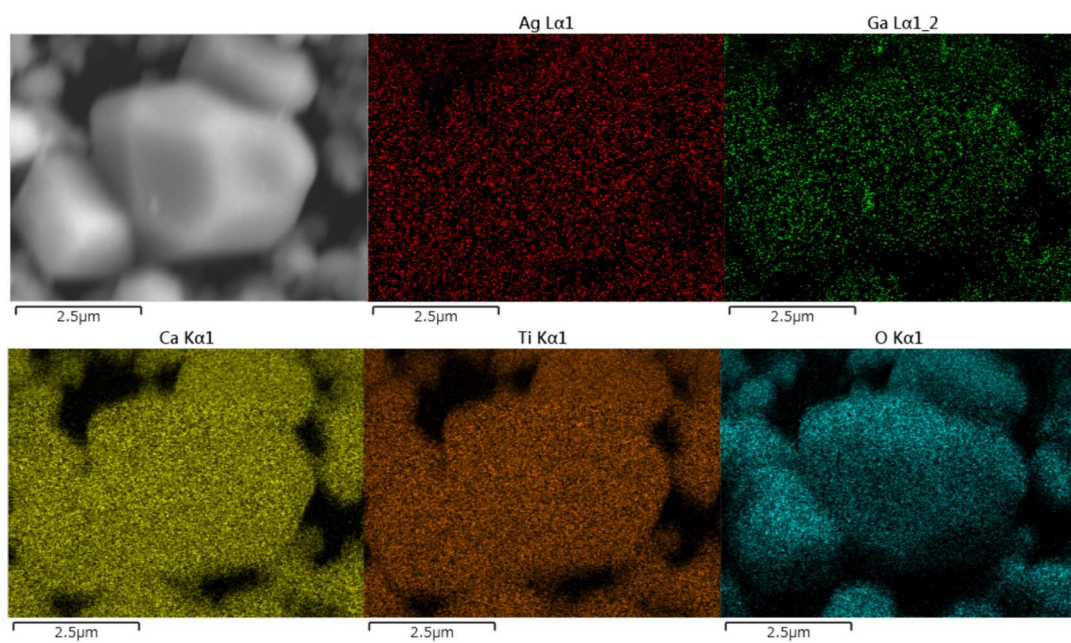

**Figure S5.** SEM-EDS of the Ag(1.0)/GaOOH(1.0)/CTO sample used for the photocatalytic reaction test for 3.5 h.
